# Supplementary material for: Nascent vessel elongation rate is inversely related to diameter in in vitro angiogenesis
Source: Royal Society of Chemistry journal article supplement (doi:10.1039/c2ib20054f), 2012-01-01
Supplement: c2ib20054f_2.pdf [file c2ib20054f_2.pdf]

## Video Captions

**Video 1: Top view of simulated growth of Sprout 1 in Figs. 4-5 during first 6 days.** Speed is determined based on the phase contrast time-point observations of tip cell location and position is determined by the center line obtained from 3D endpoint imaging.

**Video 2: Side view of simulated growth of Sprout 1 in Figs. 4-5 during first 6 days.**

**Video 3: Top view of simulated growth of Sprout 2 in Figs. 4-5 during days 3-6 using the parameter values from Table 1.** The simulation predicts that the faster growing sprout will have a smaller diameter.
